# Supplementary material for: Detection and characterization of extreme wind speed ramps
Source: Copernicus journal article supplement (doi:10.5194/wes-4-385-2019), 2019-07-09
Supplement: Supplementary file 1 [file wes-4-385-2019-supplement.zip]

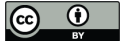

## *Supplement of*

# **Detection and characterization of extreme wind speed ramps**

**Ásta Hannesdóttir and Mark Kelly**

*Correspondence to:* Ásta Hannesdóttir (astah@dtu.dk)

- wes-4-385-2019-supplement-title-page.pdf
- ramp-characterization
  - .DS\_Store
  - .git
    - \* COMMIT\_EDITMSG
    - \* HEAD
    - \* branches
    - \* config
    - \* description
    - \* hooks
    - \* index
    - \* info
    - \* logs
    - \* objects
    - \* packed-refs
    - \* refs
  - RampCharacterization.py
  - test\_data.npy

The copyright of individual parts of the supplement might differ from the CC BY 4.0 License.
